# Supplementary material
Source: PubMed Central journal article supplement (PMC3632085)
Supplement: NIHMS444899-supplement-1.pdf [file NIHMS444899-supplement-1.pdf]

Online Supplement Data

Figure I

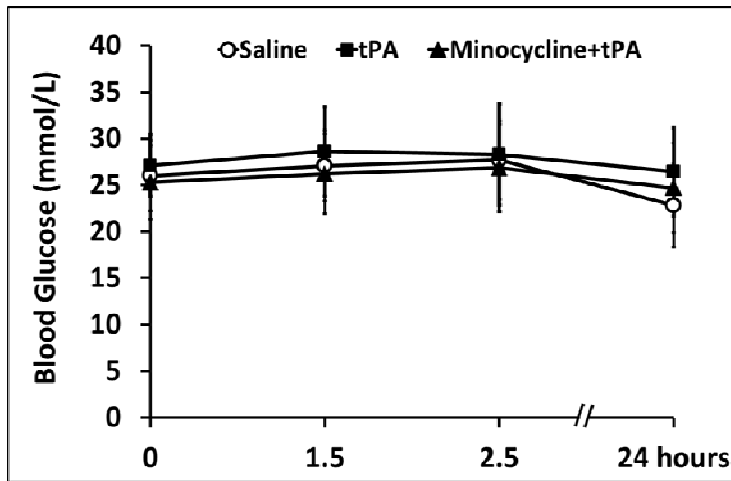

**Figure I.** Blood glucose concentrations were measured at before, 1.5, 2.5, and 24 hours after stroke. Data were expressed as mean + s.d., n=11-14 per group.

Figure II

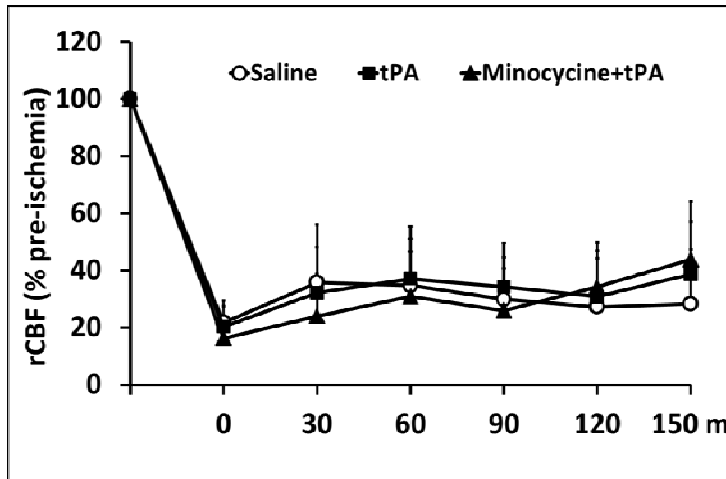

**Figure II.** Laser Doppler flowmetry monitored regional cerebral blood flow for up to 1 hour after treatment. Data were expressed as mean + s.d., n=11-14 per group.
